# Supplementary material
Source: publisher figshare collection journal article supplement (https://springernature.figshare.com/ndownloader/files/13437818)
Supplement: Supplementary file [file 13437818]

# **Case Report Forms**

*For*

**Protocol RV465 / WRAIR # 2330**

**KEMRI 0026/3246/BU#H-35152**

*Version 2.4*

*26 April, 2017*

Implementing the PMTCT standard of care under routine conditions with and without the Enhanced Mentor Mother ProgrAm (EMMA): A site-randomized impact evaluation study among maternal and child health clinics supported by the the South Rift Valley PEPFAR Program in Kenya

Short title: **The EMMA study**  
Study Conducted by US Military HIV Research Program

***Study Supported by***

*Data Coordinating and Analysis Center, (DCAC), MHRP*

*Henry M. Jackson Foundation (HJF)*

## SUMMARY of RV465 CASE REPORT FORMS

[illegible]

Subject ID: |\_|\_|-|\_|\_|

Visit Date: |\_|\_|-|\_|\_|-|\_|\_|

## RV465 Case Report Form General Completion Instructions

*(See detailed information in CRF Completion Instruction)*

### All entries:

- Case Report Forms (CRF) must be completed for every subject who is assigned a subject identification number SUBJECT ID for this study.
- Record the Subject ID in format stated in the protocol, which is 4 digits [first 2 site code, next 2 enrollment number (01-30 per site)]
- Use black or blue ballpoint pen to write entries; **do not use pencil.**
- Mark with an 'X' in applicable check boxes.
- Avoid using abbreviations unless otherwise specified.

### Corrections on the CRF:

- **Do not erase entries; do not use correction fluid**
- Draw a single line through the incorrect entry
- Write the correct information close to the original entry; do **not** write over the previous entry.
- Initial and date the corrections. **All changes must be initialed and dated by study personnel.**

### Shapes/Lines on the CRF:

- ☐ A check box - Mark **all** options that apply following the check boxes
- ☐ A circle field - Mark only **one** that apply among the options
- |\_| When brackets are provided for a field, enter **one** character per box.
- |\_\_\_\_\_| A short line with a bar at both ends is a field of a numeric value.
- \_\_\_\_\_ A long line after **Other, Specify/Comments** label is a field for long text entry.

### Dates on the CRF:

- Dates will be recorded in DDMMYYYY format, e.g., 01JAN2012.
- **DD** is for day and it must be given in 2 digits. (for example: 01, 02, 14, 25 etc...)
- **MMM** is for month and it must be written only the first 3 letters of the month in **English** language as: (JAN, FEB, MAR, APR, MAY, JUN, JUL, AUG, SEP, OCT, NOV, DEC)
- **YYYY** is for year and must be given in 4 digit (for example: 2017)

QC/QA: \_\_\_\_\_ Data Entry: 1<sup>st</sup> \_\_\_\_\_ 2<sup>nd</sup> \_\_\_\_\_

EMMA MOTHER VISIT DATA EXTRACTION FORM

(page 1 of 2)

Subject ID: |\_|\_|-|\_|\_|

Visit Date: |\_|\_|-|\_|\_|-|\_|\_|

EMMA MOTHER VISIT

Nature of Visit: ☐<sub>1</sub> Scheduled ☐<sub>2</sub> Unscheduled

Note to data extraction team: Fill in once for first ANC visit

PMTCT entry: ☐<sub>1</sub> New HIV diagnosis ☐<sub>2</sub> HAART clinic

Most recent CD4 result\*: |\_|\_|\_| cells/mm<sup>3</sup> Result Date: |\_|\_|-|\_|\_|-|\_|\_|

Most recent VL result\*: |\_|\_|\_| copies/mL Result Date: |\_|\_|-|\_|\_|-|\_|\_|

(\* If CD4 or Viral Load testing not previously done, please enter N/A for result)

Date of last menstrual period (LMP): |\_|\_|-|\_|\_|-|\_|\_|

Expected date of child birth: |\_|\_|-|\_|\_|-|\_|\_|

Gestation in weeks: |\_|\_|

Was this patient on ART prior to 1<sup>st</sup> visit for antenatal care for this pregnancy? ☐<sub>1</sub> Yes ☐<sub>0</sub> No

Date Started on ARVs: |\_|\_|-|\_|\_|-|\_|\_|

Medications (ordered during this visit)

| Medication | Strength | No. of Days Supplied | Medication | Strength | No. of Days Supplied |
|------------|----------|----------------------|------------|----------|----------------------|
| 1.         |          |                      | 5.         |          |                      |
| 2.         |          |                      | 6.         |          |                      |
| 3.         |          |                      | 7.         |          |                      |
| 4.         |          |                      | 8.         |          |                      |

What tests were ordered for the patient? (Mark all that apply)

- ☐ None
- ☐ VDRL
- ☐ Sputum for AFB
- ☐ Full Hemogram
- ☐ ALT (Alanine Aminotransferase)
- ☐ Chest x-ray
- ☐ CD4 Count Assay
- ☐ AST (Aspartate Aminotransfrase)
- ☐ Other, specify: \_\_\_\_\_
- ☐ Creatinine
- ☐ Electrolytes
- 
- ☐ HIV Viral Load
- ☐ Pregnancy Test

CD4 result if ordered at this visit: |\_|\_|\_| cells/mm<sup>3</sup>

HIV Viral load result if ordered at this visit: |\_|\_|\_| copies/mL

Form Completed by: \_\_\_\_\_ Date: |\_|\_|-|\_|\_|-|\_|\_|

QC/QA: \_\_\_\_\_ Data Entry: 1<sup>st</sup> \_\_\_\_\_ 2<sup>nd</sup> \_\_\_\_\_

EMMA MOTHER VISIT DATA EXTRACTION FORM

(page 2 of 2)

Subject ID:   |\_|\_|-|\_|\_|

Visit Date:   |\_|\_|-|\_|\_|\_|\_|-|\_|\_|\_|\_|

EMMA MOTHER VISIT

What referrals were made for the patient? *(Mark all that apply)*

- ☐ None
- ☐ Alcohol Counseling/Support groups
- ☐ Psychosocial Counseling
- ☐ Disclosure Counseling
- ☐ Family Planning Services
- ☐ TB Treatment/DOT Program
- ☐ Inpatient care/Hospitalization
- ☐ Nutritional Support
- ☐ Adherence Counseling
- ☐ Social Support Services
- ☐ Mental Health Services
- ☐ Other, *specify:* \_\_\_\_\_

Was this patient transferred to another facility for future HIV care after this visit?

- ☐ Transferred out? Date:   |\_|\_|-|\_|\_|\_|\_|-|\_|\_|\_|\_|
- Where:   \_\_\_\_\_
- ☐ Died? Date:   |\_|\_|-|\_|\_|\_|\_|-|\_|\_|\_|\_|

When is the patient’s next appointment? *(Mark appropriate field)*

- ☐ 1 week
- ☐ 2 weeks
- ☐ 1 month
- ☐ 3 months
- ☐ 6 months
- ☐ Other, *specify:* \_\_\_\_\_

Next Scheduled Appointment, Date:   |\_|\_|-|\_|\_|\_|\_|-|\_|\_|\_|\_|

| Professionals seen at this visit | Mark ‘Yes or No’                                                             | Professionals seen at this visit | Mark ‘Yes or No’                                                             |
|----------------------------------|------------------------------------------------------------------------------|----------------------------------|------------------------------------------------------------------------------|
| 1. Doctor                        | <input type="radio"/> <sub>1</sub> Yes <input type="radio"/> <sub>0</sub> No | 4. Counselor                     | <input type="radio"/> <sub>1</sub> Yes <input type="radio"/> <sub>0</sub> No |
| 2. Clinical Officer              | <input type="radio"/> <sub>1</sub> Yes <input type="radio"/> <sub>0</sub> No | 5. Lab Technician                | <input type="radio"/> <sub>1</sub> Yes <input type="radio"/> <sub>0</sub> No |
| 3. Nurse                         | <input type="radio"/> <sub>1</sub> Yes <input type="radio"/> <sub>0</sub> No | 6. Pharmacist                    | <input type="radio"/> <sub>1</sub> Yes <input type="radio"/> <sub>0</sub> No |

Additional Professionals seen, *specify:* \_\_\_\_\_

\_\_\_\_\_

Form Completed by: \_\_\_\_\_

Date:   |\_|\_|-|\_|\_|\_|\_|-|\_|\_|\_|\_|

QC/QA: \_\_\_\_\_

Data Entry: 1<sup>st</sup> \_\_\_\_\_ 2<sup>nd</sup> \_\_\_\_\_

MOTHER-INFANT EXTRACTION FORM

(page 1 of 2)

Subject ID: | | | - | | |

MOTHER PROFILE

Date of Birth: | | | - | | | - | | | | Para: | | | Gravidia: | | |

Mode of Delivery: ☐<sub>1</sub> SVD ☐<sub>2</sub> C-Section

Place of Delivery: ☐<sub>1</sub> Facility ☐<sub>2</sub> Home

Mother counselled on feeding options: ☐<sub>1</sub> Yes ☐<sub>0</sub> No Mark below feeding option chosen:

☐<sub>1</sub> Exclusive Breastfeeding ☐<sub>2</sub> Exclusive Replacement Feeding ☐<sub>3</sub> Mixed

INFANT PROFILE

Date of Birth: | | | - | | | - | | | | Birth Weight (kg): | | |

Sex: ☐<sub>1</sub> Male ☐<sub>2</sub> Female

Alive: ☐<sub>1</sub> Yes ☐<sub>0</sub> No If No, date of death: | | | - | | | - | | |

LABORATORY INFORMATION

| Date Sample Collected<br>(DD-MMM-YYYY) | HIV Test Type* | Results** |
|----------------------------------------|----------------|-----------|
| -     -                                |                |           |
| -     -                                |                |           |
| -     -                                |                |           |
| -     -                                |                |           |
| -     -                                |                |           |
| -     -                                |                |           |
| -     -                                |                |           |
| -     -                                |                |           |

\*HIV Test Type: 1. PCR 2. Antibody

\*\*Results: 0. Negative 1. Positive 2. Indeterminate 3. No Result

"Ideal timing for testing is at the 6 weeks of age, 6 months of age, 12 months of age, and 18 months of age, however please include all tests completed on the extraction form."

Form Completed by: \_\_\_\_\_ Date: | | | - | | | - | | |

QC/QA: \_\_\_\_\_ Data Entry: 1<sup>st</sup> \_\_\_\_\_ 2<sup>nd</sup> \_\_\_\_\_

MOTHER-INFANT EXTRACTION FORM

(page 2 of 2)

Subject ID: |\_|\_| - |\_|\_|

GROWTH, NUTRITION, AND DEVELOPMENT MONITORING

| Visit Date*<br>(DD-MON-YYYY) | Age<br>(wks/<br>mths) | Weight<br>(Kgs) | Height<br>(cm) | Infant<br>Feeding** | Medication<br>(Indication dose) |              |              |                | TB Assessment<br>Outcome*** | Milestones****<br>Normal (N)<br>Delayed (D)<br>Regressed (R) | Date of Next<br>Appointment<br>(DD-MON-YYYY) |
|------------------------------|-----------------------|-----------------|----------------|---------------------|---------------------------------|--------------|--------------|----------------|-----------------------------|--------------------------------------------------------------|----------------------------------------------|
|                              |                       |                 |                |                     | AZT<br>(mls)                    | NVP<br>(mls) | CTX<br>(mls) | M/Vit<br>(Y/N) |                             |                                                              |                                              |
| (a)                          | (b)                   | (c)             | (d)            | (e)                 | (f)                             | (g)          | (h)          | (i)            | (j)                         | (k)                                                          | (l)                                          |
| _ - _ - _ _ _ _              |                       |                 |                |                     |                                 |              |              |                |                             |                                                              | _ - _ - _ _ _ _                              |
| _ - _ - _ _ _ _              |                       |                 |                |                     |                                 |              |              |                |                             |                                                              | _ - _ - _ _ _ _                              |
| _ - _ - _ _ _ _              |                       |                 |                |                     |                                 |              |              |                |                             |                                                              | _ - _ - _ _ _ _                              |
| _ - _ - _ _ _ _              |                       |                 |                |                     |                                 |              |              |                |                             |                                                              | _ - _ - _ _ _ _                              |
| _ - _ - _ _ _ _              |                       |                 |                |                     |                                 |              |              |                |                             |                                                              | _ - _ - _ _ _ _                              |
| _ - _ - _ _ _ _              |                       |                 |                |                     |                                 |              |              |                |                             |                                                              | _ - _ - _ _ _ _                              |
| _ - _ - _ _ _ _              |                       |                 |                |                     |                                 |              |              |                |                             |                                                              | _ - _ - _ _ _ _                              |

\* Visit Dates should correspond to the test dates above.

\*\*Infant Feeding 1. Exclusive Breastfeeding (EBF) 2. Exclusive Replacement Feeding (ERF) 3. Mixed (BF+RF)

\*\*\*TB Assessment Outcome 1. No signs 2. Presumed TB 3. Confirmed 4. TB Rx 5. Not done (ND)

\*\*\*\*Milestones by Age

| Age Ranges | Milestones                       |
|------------|----------------------------------|
| 4-6 Weeks  | Social Smile                     |
| 1-3 Months | Head Holding/Control             |
| 2-3 Months | Turns toward the origin of sound |

|              |          |
|--------------|----------|
| 5-9 Months   | Sitting  |
| 7-13 Months  | Standing |
| 12-18 Months | Walking  |
| 9-24 Months  | Talking  |

Form Completed by: \_\_\_\_\_

Date: |\_|\_|-|\_|\_|-|\_|\_|\_|\_|

## EMMA Mentor-Mother/Patient Visit Record Form

Subject ID: |\_|\_|-|\_|\_|

Visit Date: |\_|\_|-|\_|\_|-|\_|\_|

**1. Age of baby or gestational age (Mark what applies during this visit and circle wks or month)**

☐<sub>1</sub> Gestational age |\_\_\_\_\_| (wks / months)

☐<sub>2</sub> Age of Infant/baby |\_\_\_\_\_| (wks / months)

**2. Did Mentor-mother recap all the key clinic processes with the patient/mother? (appointment schedule should guide the discussion, attend to any questions and clarifications.)**

☐<sub>1</sub> Yes

☐<sub>0</sub> No

**3. Was EMMA Mentor-mother guidelines (Adherence, Psychosocial support, Treatment support, Partner involvement) discussed during final interaction with patient/mother?**

☐<sub>1</sub> Yes

☐<sub>0</sub> No

**4. Contact information – Mark all that apply (ensure contact tracing for is updated.)**

☐ Full consent for telephonic follow up

☐ Call only

☐ Sms / Text only

☐ No consent for telephonic follow up

☐ Full consent for home follow up

☐ No consent for home follow up

**5. Next visit date:** |\_|\_|-|\_|\_|-|\_|\_|

**6. Text / Sms reminder scheduled on EMMA system based on No. 4 information.**

☐<sub>1</sub> Yes

☐<sub>0</sub> No

**Comments:** \_\_\_\_\_

\_\_\_\_\_

Form Completed by: \_\_\_\_\_

Date: |\_|\_|-|\_|\_|-|\_|\_|

QC/QA: \_\_\_\_\_ Data Entry: 1<sup>st</sup> \_\_\_\_\_ 2<sup>nd</sup> \_\_\_\_\_
